# Supplementary material for: Formation of unexpected S–S covalent bonds in H2S dimers under confinement
Source: Royal Society of Chemistry journal article supplement (doi:10.1039/d0cp05807f), 2021-01-01
Supplement: d0cp05807f1.pdf [file d0cp05807f1.pdf]

**ESI of**

**Formation of unexpected S-S covalent bond in**

**H<sub>2</sub>S dimer under confinement.**

Amit Kumar and Pradeep Kumar\*

*Department of Chemistry, Malaviya National Institute of Technology Jaipur, Jaipur,  
302017, India*

E-mail: [pradeep.chy@mnit.ac.in](mailto:pradeep.chy@mnit.ac.in)

**Sl. No.****Contents**

1. **Table S1:** Optimized geometries in cartesian coordinates and all normal mode frequencies calculated at the LC-wHPBE/6-31++G\*\* level of theory.
2. **Table S2:** Natural population analysis of  $(\text{H}_2\text{S})_2@C_{60}$ .
3. **Table S3:** Natural population analysis of  $(\text{H}_2\text{S})_2@C_{70}$ .
4. **Table S4:** Natural population analysis of  $(\text{H}_2\text{S})_2@C_{84}$ .
5. **Table S5:** Electron density and Laplacian showing the weak interaction between  $(\text{H}_2\text{S})_2$  and cage in  $(\text{H}_2\text{S})_2@C_{60}$ ,  $(\text{H}_2\text{S})_2@C_{70}$ , and  $(\text{H}_2\text{S})_2@C_{84}$ .
6. **Table S6:** The stabilization energy in  $\text{kcal mol}^{-1}$  of  $(\text{H}_2\text{S})_2$  encapsulated in  $C_{60}$  fullerene, at different method of DFT functionals.
7. **Table S7:** Comparison of UHF and RHF results of  $(\text{H}_2\text{S})_2@C_{60}$  at LC-wHPBE/6-31++G\*\* level of theory.
8. **Table S8:** Natural electronic configuration, valence electron and natural charge on bare  $(\text{H}_2\text{S})_2$ .
9. **Table S9:** Natural electronic configuration, valence electron and natural charge on  $(\text{H}_2\text{S})_2$  unit obtained from NBO analysis of  $(\text{H}_2\text{S})_2@C_{70}$ .
10. **Table S10:** Natural electronic configuration, valence electron and natural charge on  $(\text{H}_2\text{S})_2$  unit obtained from NBO analysis of  $(\text{H}_2\text{S})_2@C_{84}$ .
11. **Figure S1:** Spatial representation of the S-S bond MO in  $\text{H}_2\text{S}_2$  and  $(\text{H}_2\text{S})_2@C_{60}$  obtained at LC-wHPBE/6-31++G\*\* level of theory.
12. **Figure S2:** IR plot for the  $C_{60}$  molecule obtained at LC-wHPBE/6-31++G\*\* level of theory.
13. **Figure S3:** IR plot for the  $(\text{H}_2\text{S})_2@C_{60}$  molecule obtained at LC-wHPBE/6-31++G\*\* level of theory.
14. **Figure S4:** IR plot for the  $C_{70}$  molecule obtained at LC-wHPBE/6-31++G\*\* level of theory.
15. **Figure S5:** IR plot for the  $(\text{H}_2\text{S})_2@C_{70}$  molecule obtained at LC-wHPBE/6-31++G\*\* level of theory.
16. **Figure S6:** IR plot for the  $C_{84}$  molecule obtained at LC-wHPBE/6-31++G\*\* level of theory.
17. **Figure S7:** IR plot for the  $(\text{H}_2\text{S})_2@C_{84}$  molecule obtained at LC-wHPBE/6-31++G\*\* level of theory.

Table S1: Optimized geometries in cartesian coordinates and all normal mode frequencies calculated at the LC-wHPBE/6-31++G\*\* level of theory.

| Species                         | Cartesian coordinates (Å) |           |           | Frequencies (cm <sup>-1</sup> ) |           |           |           |
|---------------------------------|---------------------------|-----------|-----------|---------------------------------|-----------|-----------|-----------|
| H <sub>2</sub> S <sub>2</sub>   | S                         | -1.023256 | -0.06782  | 0.054595                        | 437.6006  | 567.4076  | 935.7246  |
|                                 | H                         | -1.287214 | 0.862608  | -0.873514                       | 941.4459  | 2786.0131 | 2787.5418 |
|                                 | S                         | 1.023256  | 0.06782   | 0.054595                        |           |           |           |
|                                 | H                         | 1.287214  | -0.862605 | -0.873517                       |           |           |           |
| (H <sub>2</sub> S) <sub>2</sub> | H                         | 2.322661  | 1.232566  | -0.001317                       | 32.475    | 62.1678   | 99.1775   |
|                                 | H                         | 0.785926  | 0.036535  | 0.000883                        | 101.2304  | 179.9824  | 299.9779  |
|                                 | S                         | 2.120621  | -0.08923  | 0.000109                        | 1235.4364 | 1245.7379 | 2784.5608 |
|                                 | H                         | -2.32644  | -0.759631 | 0.973958                        | 2823.293  | 2831.1972 | 2842.5763 |
|                                 | H                         | -2.322726 | -0.762656 | -0.972735                       |           |           |           |
|                                 | S                         | -2.024335 | 0.105054  | -0.000158                       |           |           |           |
| C <sub>60</sub>                 | C                         | -3.276636 | 0.476541  | 1.215409                        | 271.3021  | 271.3088  | 271.3152  |
|                                 | C                         | -2.955239 | 1.792244  | 0.703505                        | 271.3223  | 271.3343  | 346.6748  |
|                                 | C                         | -2.835062 | 1.99308   | -0.656232                       | 346.6967  | 346.7372  | 365.7942  |
|                                 | C                         | -3.030337 | 0.88809   | -1.571266                       | 365.8032  | 365.8186  | 365.8394  |
|                                 | C                         | -3.3366   | -0.365657 | -1.083457                       | 415.2655  | 415.2767  | 415.294   |
|                                 | C                         | -3.462731 | -0.576418 | 0.343474                        | 415.3103  | 415.3276  | 447.8257  |
|                                 | C                         | -2.530975 | 0.278738  | 2.44069                         | 447.8529  | 447.8667  | 447.8793  |
|                                 | C                         | -1.748754 | 1.472182  | 2.686061                        | 447.8893  | 501.935   | 501.9377  |
|                                 | C                         | -2.010962 | 2.407577  | 1.61242                         | 501.9583  | 501.9881  | 513.6365  |
|                                 | C                         | -0.990995 | 3.194762  | 1.118837                        | 555.5115  | 555.5247  | 555.5372  |
|                                 | C                         | -1.764682 | 2.819155  | -1.174212                       | 555.5474  | 555.5671  | 556.5808  |
|                                 | C                         | -2.08064  | 1.031221  | -2.654792                       | 556.5951  | 556.6277  | 574.2833  |

|   |           |           |           |           |           |           |
|---|-----------|-----------|-----------|-----------|-----------|-----------|
| C | -1.481943 | -0.086134 | -3.19949  | 574.2954  | 574.3465  | 582.7744  |
| C | -1.803354 | -1.401842 | -2.687588 | 582.8546  | 582.8799  | 582.9033  |
| C | -2.708319 | -1.538223 | -1.655073 | 594.1402  | 594.1603  | 594.1923  |
| C | -2.446118 | -2.473637 | -0.581457 | 609.1584  | 609.1602  | 609.1683  |
| C | -2.912343 | -1.87922  | 0.653735  | 688.7625  | 688.7707  | 688.7828  |
| C | -2.201783 | -2.067718 | 1.821297  | 688.8034  | 688.843   | 739.4799  |
| C | -2.006508 | -0.962711 | 2.736318  | 739.5008  | 739.5388  | 739.5532  |
| C | -0.478912 | 1.367996  | 3.215493  | 739.5616  | 745.9681  | 745.9789  |
| C | 0.071442  | 0.065223  | 3.525734  | 746.0035  | 746.1695  | 746.1892  |
| C | -0.673941 | -1.072044 | 3.291918  | 746.2056  | 746.2313  | 748.855   |
| C | -0.04565  | -2.244613 | 2.720296  | 748.8954  | 748.9174  | 759.6994  |
| C | -0.989901 | -2.859972 | 1.811361  | 759.7186  | 759.7459  | 759.7597  |
| C | -0.545629 | -3.426423 | 0.634329  | 759.777   | 774.2506  | 774.2608  |
| C | -1.291288 | -3.228593 | -0.590922 | 774.2747  | 774.3219  | 776.5612  |
| C | -0.341599 | -3.085448 | -1.674453 | 776.5673  | 776.5915  | 776.599   |
| C | -0.591467 | -2.194094 | -2.697517 | 814.2094  | 814.2255  | 814.2329  |
| C | -1.298439 | 2.224689  | -2.409408 | 814.2433  | 814.2921  | 814.2944  |
| C | 2.530975  | -0.278737 | -2.440689 | 814.3206  | 814.3601  | 855.922   |
| C | 2.006509  | 0.962711  | -2.736317 | 855.9523  | 855.9794  | 980.7276  |
| C | 2.201783  | 2.067717  | -1.821297 | 995.158   | 995.1955  | 995.2322  |
| C | 2.912344  | 1.879219  | -0.653736 | 1015.0324 | 1015.0461 | 1015.0576 |
| C | 3.462732  | 0.576419  | -0.343475 | 1015.1254 | 1112.507  | 1112.5446 |
| C | 2.955238  | -1.792244 | -0.703505 | 1112.5806 | 1112.5943 | 1167.2282 |
| C | 2.010962  | -2.407576 | -1.612421 | 1167.2539 | 1167.2794 | 1167.3203 |
| C | 1.748754  | -1.472183 | -2.68606  | 1167.341  | 1226.1031 | 1226.1371 |
| C | 0.478912  | -1.367997 | -3.215493 | 1226.1424 | 1262.4121 | 1262.4525 |

|                                                  |   |           |           |           |           |           |           |
|--------------------------------------------------|---|-----------|-----------|-----------|-----------|-----------|-----------|
|                                                  | C | -0.071443 | -0.065222 | -3.525734 | 1262.4694 | 1300.0116 | 1300.0265 |
|                                                  | C | 0.67394   | 1.072045  | -3.291918 | 1300.0743 | 1300.1374 | 1300.1623 |
|                                                  | C | 0.989901  | 2.859972  | -1.811361 | 1346.0088 | 1346.0413 | 1346.07   |
|                                                  | C | 0.545629  | 3.426423  | -0.634329 | 1346.1161 | 1346.1437 | 1352.0486 |
|                                                  | C | 1.291288  | 3.228592  | 0.590923  | 1352.0786 | 1352.162  | 1376.9641 |
|                                                  | C | 2.446118  | 2.473637  | 0.581458  | 1376.9946 | 1377.0316 | 1377.0474 |
|                                                  | C | 2.708319  | 1.538224  | 1.655073  | 1397.1926 | 1397.1979 | 1397.2764 |
|                                                  | C | 3.3366    | 0.365657  | 1.083457  | 1397.3056 | 1433.9053 | 1433.9197 |
|                                                  | C | 3.030336  | -0.888089 | 1.571265  | 1433.9808 | 1433.9917 | 1434.013  |
|                                                  | C | 2.835062  | -1.99308  | 0.656231  | 1452.556  | 1452.5779 | 1452.6067 |
|                                                  | C | 0.990995  | -3.194763 | -1.118838 | 1531.9941 | 1532.0238 | 1532.0372 |
|                                                  | C | 0.86488   | -3.405513 | 0.308063  | 1532.0679 | 1532.119  | 1532.3347 |
|                                                  | C | 1.764681  | -2.819155 | 1.174212  | 1532.3617 | 1532.3976 | 1551.902  |
|                                                  | C | 1.298438  | -2.224689 | 2.409408  | 1551.9525 | 1551.9765 | 1552.0439 |
|                                                  | C | 2.08064   | -1.03122  | 2.654792  | 1577.4343 | 1625.9597 | 1625.975  |
|                                                  | C | 1.481944  | 0.086134  | 3.19949   | 1625.9913 | 1626.0747 | 1648.0031 |
|                                                  | C | 1.803354  | 1.401842  | 2.687589  | 1648.0506 | 1648.0722 | 1709.6801 |
|                                                  | C | 0.591468  | 2.194094  | 2.697517  | 1709.6815 | 1709.725  | 1709.7491 |
|                                                  | C | 0.3416    | 3.085447  | 1.674453  | 1709.7719 | 1715.484  | 1715.4967 |
|                                                  | C | 0.04565   | 2.244612  | -2.720296 | 1715.5181 | 1715.5549 | 1715.5806 |
|                                                  | C | -0.86488  | 3.405512  | -0.308062 |           |           |           |
|                                                  | C | 3.276636  | -0.476541 | -1.215409 |           |           |           |
| (H <sub>2</sub> S) <sub>2</sub> @C <sub>60</sub> | C | -2.9722   | -0.44781  | 1.95109   | 77.2899   | 130.4295  | 164.7509  |
|                                                  | C | -1.95614  | -0.34868  | 2.93857   | 191.7402  | 210.2054  | 226.742   |
|                                                  | C | -1.28436  | 0.87941   | 3.17124   | 272.3001  | 281.3167  | 301.5942  |

|   |          |          |          |          |          |          |
|---|----------|----------|----------|----------|----------|----------|
| C | -1.62521 | 2.02983  | 2.37851  | 303.2248 | 349.603  | 362.9112 |
| C | -2.62508 | 1.96443  | 1.40453  | 364.8172 | 372.9855 | 377.9108 |
| C | -3.2969  | 0.68559  | 1.16056  | 386.4041 | 392.8766 | 394.5103 |
| C | -2.83572 | -1.74866 | 1.28101  | 400.1385 | 405.9382 | 409.5138 |
| C | -1.71898 | -2.44214 | 1.89887  | 412.0663 | 418.7833 | 427.8902 |
| C | -1.1682  | -1.56328 | 2.91255  | 429.8479 | 460.9962 | 466.9427 |
| C | 0.20183  | -1.54287 | 3.13304  | 477.0853 | 500.1931 | 511.9245 |
| C | 0.12948  | 0.89666  | 3.3815   | 515.119  | 516.0082 | 525.9997 |
| C | -0.4027  | 2.78993  | 2.12615  | 532.0669 | 532.7929 | 538.3089 |
| C | -0.21197 | 3.4257   | 0.91142  | 546.6503 | 560.8489 | 562.8375 |
| C | -1.22684 | 3.35339  | -0.11452 | 566.0425 | 568.1226 | 569.255  |
| C | -2.42783 | 2.63247  | 0.13165  | 570.6813 | 576.6899 | 579.1794 |
| C | -2.96303 | 1.76181  | -0.89813 | 581.5881 | 582.8208 | 584.1882 |
| C | -3.495   | 0.5549   | -0.25392 | 586.2897 | 590.8012 | 595.6301 |
| C | -3.41558 | -0.71885 | -0.90787 | 605.7498 | 609.3515 | 612.4627 |
| C | -3.04354 | -1.87741 | -0.08417 | 619.8714 | 637.4898 | 645.8807 |
| C | -0.86147 | -3.22966 | 1.15053  | 666.1364 | 680.1876 | 681.936  |
| C | -1.07727 | -3.36297 | -0.27135 | 683.7792 | 687.2087 | 688.1299 |
| C | -2.13815 | -2.70312 | -0.86978 | 725.5616 | 732.7978 | 736.3545 |
| C | -1.94041 | -2.03811 | -2.14506 | 736.8918 | 739.7357 | 740.951  |
| C | -2.75753 | -0.8269  | -2.15809 | 748.6178 | 749.3763 | 757.8064 |
| C | -2.18007 | 0.34127  | -2.76264 | 759.5848 | 762.3654 | 764.6977 |
| C | -2.30697 | 1.64487  | -2.12398 | 769.506  | 769.8726 | 771.9673 |
| C | -1.08394 | 2.39254  | -2.36788 | 773.4624 | 773.9584 | 779.379  |
| C | -0.55873 | 3.22552  | -1.37568 | 782.5402 | 787.523  | 789.0455 |
| C | 0.69081  | 2.07876  | 2.74285  | 790.1736 | 792.5461 | 794.0332 |

|   |          |          |          |           |           |           |
|---|----------|----------|----------|-----------|-----------|-----------|
| C | 2.85045  | 1.74843  | -1.28    | 794.7914  | 797.5355  | 799.4955  |
| C | 3.05983  | 1.87548  | 0.09171  | 802.8657  | 806.3266  | 806.9416  |
| C | 3.41001  | 0.71068  | 0.89663  | 809.3946  | 813.9059  | 815.4198  |
| C | 3.50756  | -0.5496  | 0.25612  | 816.5852  | 830.9672  | 849.9709  |
| C | 3.30798  | -0.68175 | -1.16525 | 852.9965  | 853.875   | 874.2916  |
| C | 1.95206  | 0.35477  | -2.93989 | 936.6178  | 951.4249  | 974.7962  |
| C | 1.17704  | 1.56556  | -2.91606 | 978.7632  | 987.2863  | 992.624   |
| C | 1.7286   | 2.44634  | -1.8986  | 1001.5719 | 1002.683  | 1010.3816 |
| C | 0.87661  | 3.23897  | -1.14662 | 1020.9535 | 1038.7434 | 1059.3648 |
| C | 1.09798  | 3.37024  | 0.27862  | 1098.5077 | 1109.5184 | 1111.5011 |
| C | 2.15198  | 2.70473  | 0.87866  | 1119.4451 | 1131.9067 | 1152.6534 |
| C | 2.7391   | 0.8205   | 2.15988  | 1155.4103 | 1162.7391 | 1165.1733 |
| C | 2.18449  | -0.33541 | 2.76904  | 1190.157  | 1191.3368 | 1201.5078 |
| C | 2.32091  | -1.64001 | 2.12904  | 1208.5669 | 1230.2095 | 1231.6613 |
| C | 2.97205  | -1.75447 | 0.90284  | 1241.1099 | 1247.3264 | 1262.1422 |
| C | 2.4344   | -2.62235 | -0.12971 | 1265.0366 | 1282.0021 | 1285.0102 |
| C | 2.62926  | -1.95985 | -1.40503 | 1290.5217 | 1308.1878 | 1314.6966 |
| C | 1.63164  | -2.02775 | -2.37254 | 1317.8242 | 1323.1324 | 1331.4672 |
| C | 1.28197  | -0.87108 | -3.16957 | 1338.6904 | 1345.0679 | 1346.0766 |
| C | -0.19961 | 1.54969  | -3.12682 | 1350.2368 | 1357.0042 | 1362.2296 |
| C | -0.87975 | 0.28734  | -3.36909 | 1371.3037 | 1377.9407 | 1384.7394 |
| C | -0.12401 | -0.89212 | -3.38558 | 1385.7988 | 1390.0095 | 1390.3965 |
| C | -0.68579 | -2.07596 | -2.73728 | 1395.9129 | 1399.0783 | 1416.7951 |
| C | 0.4117   | -2.78184 | -2.12181 | 1421.4041 | 1422.1194 | 1433.2258 |
| C | 0.22608  | -3.41297 | -0.90545 | 1438.1978 | 1440.7629 | 1442.7684 |
| C | 1.2462   | -3.32668 | 0.11345  | 1466.0608 | 1472.1549 | 1495.5402 |

|                 |   |           |           |           |           |           |           |
|-----------------|---|-----------|-----------|-----------|-----------|-----------|-----------|
|                 | C | 0.57133   | -3.20519  | 1.38013   | 1498.1843 | 1503.581  | 1509.1533 |
|                 | C | 1.09392   | -2.38165  | 2.36958   | 1518.7777 | 1525.1753 | 1541.1762 |
|                 | C | 1.94742   | 2.0363    | 2.15347   | 1552.7238 | 1568.8953 | 1574.6902 |
|                 | C | 0.88285   | -0.28041  | 3.37833   | 1578.524  | 1582.7673 | 1587.7359 |
|                 | C | 2.9761    | 0.44644   | -1.94089  | 1599.8247 | 1610.9206 | 1614.1555 |
|                 | S | -1.04313  | 0.02064   | 0.01644   | 1620.8826 | 1635.6271 | 1641.3812 |
|                 | H | -1.04006  | 1.3754    | 0.17071   | 1650.4891 | 1659.5658 | 1668.7773 |
|                 | S | 0.94535   | -0.23146  | -0.02923  | 1671.6407 | 1675.7316 | 2031.6359 |
|                 | H | 1.30149   | 1.00998   | -0.44205  | 2294.7338 | 2456.9551 | 2556.4674 |
|                 | H | 1.1314    | -0.02061  | 1.3177    |           |           |           |
|                 | H | -1.20024  | 0.03009   | -1.37162  |           |           |           |
| C <sub>70</sub> | C | 3.212338  | -1.094467 | -2.127622 | -43.24    | 62.0428   | 126.9576  |
|                 | C | 2.434428  | -2.290591 | -1.923119 | 131.5882  | 199.8879  | 222.5101  |
|                 | C | 3.959623  | -0.562571 | -1.093913 | 237.1267  | 237.5635  | 238.633   |
|                 | C | 2.434127  | -2.907347 | -0.700254 | 265.2453  | 288.4505  | 291.0493  |
|                 | C | 1.195222  | -3.438637 | -0.159091 | 293.1067  | 311.1258  | 322.0334  |
|                 | C | -0.000079 | -3.42238  | -0.905225 | 322.9516  | 334.6637  | 336.3755  |
|                 | C | -1.195274 | -3.438382 | -0.159353 | 346.9488  | 359.2362  | 360.5147  |
|                 | C | 3.212316  | 1.685229  | -1.698176 | 366.0944  | 384.971   | 389.3265  |
|                 | C | 2.434505  | 1.121197  | -2.772522 | 402.7358  | 404.8382  | 431.0469  |
|                 | C | 3.959788  | 0.866504  | -0.873235 | 433.8297  | 435.4501  | 436.6515  |
|                 | C | 2.434154  | -0.232452 | -2.981357 | 437.1475  | 450.6457  | 455.5319  |
|                 | C | 1.195236  | -0.911276 | -3.319336 | 465.3307  | 467.6869  | 469.7251  |
|                 | C | -0.000137 | -0.19671  | -3.534298 | 486.4248  | 502.8398  | 508.3666  |
|                 | C | -1.195323 | -0.911102 | -3.319361 | 508.7935  | 510.4007  | 530.4667  |



|   |           |           |           |          |          |          |
|---|-----------|-----------|-----------|----------|----------|----------|
| C | -0.000064 | -2.761261 | -2.215699 | 531.2082 | 536.1091 | 537.7683 |
| C | 1.19526   | -2.170502 | -2.671603 | 551.0444 | 553.3347 | 553.6616 |
| C | -1.195258 | -2.17077  | -2.671572 | 555.1793 | 557.0668 | 558.2514 |
| C | 3.212277  | 2.135921  | 1.077965  | 561.2763 | 561.9116 | 564.2196 |
| C | 2.434271  | 2.983367  | 0.209421  | 566.7065 | 571.8245 | 573.6227 |
| C | 3.959657  | 1.098225  | 0.554342  | 575.0075 | 591.8524 | 593.5071 |
| C | 2.434472  | 2.764158  | -1.142505 | 599.5118 | 604.8116 | 608.0786 |
| C | 1.195297  | 2.87535   | -1.892404 | 609.6011 | 621.6593 | 630.6945 |
| C | -0.000027 | 3.300838  | -1.27943  | 650.7549 | 650.894  | 658.7007 |
| C | -1.195266 | 2.875579  | -1.892189 | 658.914  | 662.9931 | 688.5321 |
| C | -0.00003  | 1.253763  | -3.310458 | 688.6117 | 698.2782 | 698.6089 |
| C | 1.195319  | 1.870046  | -2.889564 | 700.1695 | 701.4949 | 726.2258 |
| C | -1.195155 | 1.869857  | -2.889649 | 728.6689 | 736.4522 | 740.6106 |
| C | 3.212261  | -0.365268 | 2.364708  | 742.7453 | 743.8586 | 749.0615 |
| C | 2.434039  | 0.722638  | 2.90198   | 751.3378 | 752.8059 | 754.0394 |
| C | 3.959554  | -0.187753 | 1.215803  | 755.8455 | 759.9197 | 765.2843 |
| C | 2.434401  | 1.940618  | 2.27553   | 766.4783 | 766.6567 | 768.2967 |
| C | 1.195273  | 2.688163  | 2.149664  | 771.9428 | 773.5999 | 774.6834 |
| C | -0.000102 | 2.236638  | 2.743869  | 776.0358 | 777.2133 | 777.9343 |
| C | -1.195209 | 2.687991  | 2.149702  | 778.689  | 788.6228 | 789.1812 |
| C | -0.00007  | 3.535939  | 0.169458  | 789.5975 | 792.1321 | 792.6132 |
| C | 1.195222  | 3.326292  | 0.885632  | 794.2463 | 795.5147 | 804.3886 |
| C | -1.195322 | 3.326447  | 0.885298  | 804.4485 | 805.5566 | 805.9535 |
| C | 3.212531  | -2.361887 | 0.383476  | 808.9378 | 809.1323 | 812.2968 |
| C | 2.434117  | -2.536451 | 1.58395   | 822.704  | 822.9252 | 858.6661 |
| C | 3.959526  | -1.214206 | 0.197215  | 858.9115 | 895.4422 | 919.5947 |

|   |           |           |          |           |           |           |
|---|-----------|-----------|----------|-----------|-----------|-----------|
| C | 2.434309  | -1.564511 | 2.548973 | 940.3519  | 942.1837  | 947.4014  |
| C | 1.195143  | -1.213881 | 3.221065 | 948.8737  | 965.6976  | 994.8986  |
| C | -0.000134 | -1.918555 | 2.975366 | 995.2435  | 1072.7392 | 1074.8107 |
| C | -1.195337 | -1.214133 | 3.220997 | 1075.5056 | 1078.0243 | 1098.0611 |
| C | -0.00023  | 0.931444  | 3.415132 | 1117.432  | 1117.5906 | 1149.8668 |
| C | 1.195115  | 0.18562   | 3.437265 | 1150.0954 | 1164.4735 | 1168.2291 |
| C | -1.195395 | 0.185757  | 3.437143 | 1191.3758 | 1208.7932 | 1209.3233 |
| C | -0.000093 | -2.960197 | 1.941278 | 1230.2859 | 1230.8263 | 1234.8362 |
| C | 1.195212  | -3.211671 | 1.238609 | 1239.9791 | 1240.0741 | 1245.0888 |
| C | -1.195251 | -3.211293 | 1.238716 | 1267.9779 | 1276.9811 | 1277.9235 |
| C | -3.212472 | -0.36521  | 2.364883 | 1279.1116 | 1292.5983 | 1301.5488 |
| C | -2.434448 | -1.564699 | 2.54927  | 1304.0637 | 1306.0874 | 1306.7811 |
| C | -2.434037 | -2.536314 | 1.583938 | 1311.8593 | 1312.1221 | 1312.7361 |
| C | 3.959526  | -1.214206 | 0.197215 | 1313.4833 | 1337.4695 | 1338.0524 |
| C | 2.434309  | -1.564511 | 2.548973 | 1362.3285 | 1363.3633 | 1363.9658 |
| C | 1.195143  | -1.213881 | 3.221065 | 1364.7048 | 1375.7526 | 1381.5446 |
| C | -0.000134 | -1.918555 | 2.975366 | 1384.9023 | 1386.4752 | 1387.1739 |
| C | -1.195337 | -1.214133 | 3.220997 | 1399.116  | 1399.3308 | 1400.4244 |
| C | -0.00023  | 0.931444  | 3.415132 | 1408.8413 | 1410.2523 | 1415.9317 |
| C | 1.195115  | 0.18562   | 3.437265 | 1416.3162 | 1427.8362 | 1430.841  |
| C | -1.195395 | 0.185757  | 3.437143 | 1431.2135 | 1456.1534 | 1456.9378 |
| C | -0.000093 | -2.960197 | 1.941278 | 1477.6624 | 1478.9393 | 1483.1786 |
| C | 1.195212  | -3.211671 | 1.238609 | 1483.1943 | 1496.8085 | 1503.6912 |
| C | -1.195251 | -3.211293 | 1.238716 | 1507.3018 | 1509.87   | 1511.3751 |
| C | -3.212472 | -0.36521  | 2.364883 | 1511.9607 | 1529.4852 | 1557.4803 |
| C | -2.434448 | -1.564699 | 2.54927  | 1557.8481 | 1592.7471 | 1594.9862 |

|                                                  |   |           |           |           |           |           |           |
|--------------------------------------------------|---|-----------|-----------|-----------|-----------|-----------|-----------|
|                                                  | C | -2.434037 | -2.536314 | 1.583938  | 1597.0825 | 1601.2563 | 1603.4642 |
|                                                  | C | -3.959495 | -0.187675 | 1.215788  | 1609.1855 | 1611.5238 | 1624.9978 |
|                                                  | C | -3.212481 | 2.136289  | 1.07817   | 1626.089  | 1636.1111 | 1636.4648 |
|                                                  | C | -2.434152 | 1.940488  | 2.275415  | 1671.4603 | 1680.5316 | 1681.1594 |
|                                                  | C | -2.434382 | 0.722658  | 2.902257  | 1684.0204 | 1685.235  | 1690.0543 |
|                                                  | C | -3.959225 | 1.098076  | 0.554369  | 1696.3858 | 1696.6148 | 1699.7369 |
|                                                  | C | -3.212457 | 1.685532  | -1.698658 | 1700.9708 | 1706.904  | 2842.0831 |
|                                                  | C | -2.434261 | 2.764251  | -1.142569 | 2857.8012 | 2908.5926 | 3126.4357 |
|                                                  | C | -2.434227 | 2.983571  | 0.209373  |           |           |           |
|                                                  | C | -3.959247 | 0.866334  | -0.873354 |           |           |           |
|                                                  | C | -3.212452 | -1.094542 | -2.127967 |           |           |           |
|                                                  | C | -2.434224 | -0.232517 | -2.981606 |           |           |           |
|                                                  | C | -2.434218 | 1.121158  | -2.772575 |           |           |           |
|                                                  | C | -3.959486 | -0.562536 | -1.094083 |           |           |           |
|                                                  | C | -3.212423 | -2.361943 | 0.383389  |           |           |           |
|                                                  | C | -2.434117 | -2.907345 | -0.700404 |           |           |           |
|                                                  | C | -2.434351 | -2.290839 | -1.923371 |           |           |           |
|                                                  | C | -3.959085 | -1.214066 | 0.197113  |           |           |           |
| (H <sub>2</sub> S) <sub>2</sub> @C <sub>70</sub> | C | 3.252642  | -0.644424 | -2.305927 | -43.24    | 62.0428   | 126.9576  |
|                                                  | C | 2.453136  | -1.848955 | -2.351596 | 131.5882  | 199.8879  | 222.5101  |
|                                                  | C | 4.03832   | -0.342135 | -1.195719 | 237.1267  | 237.5635  | 238.633   |
|                                                  | C | 2.444229  | -2.703519 | -1.28279  | 265.2453  | 288.4505  | 291.0493  |
|                                                  | C | 1.191079  | -3.321057 | -0.864439 | 293.1067  | 311.1258  | 322.0334  |
|                                                  | C | -0.010379 | -3.148038 | -1.586549 | 322.9516  | 334.6637  | 336.3755  |
|                                                  | C | -1.215659 | -3.310835 | -0.8674   | 346.9488  | 359.2362  | 360.5147  |

|   |           |           |           |          |          |          |
|---|-----------|-----------|-----------|----------|----------|----------|
| C | 3.272559  | 1.993653  | -1.314228 | 366.0944 | 384.971  | 389.3265 |
| C | 2.472156  | 1.659233  | -2.471973 | 402.7358 | 404.8382 | 431.0469 |
| C | 4.056331  | 1.025843  | -0.681071 | 433.8297 | 435.4501 | 436.6515 |
| C | 2.462657  | 0.377209  | -2.953298 | 437.1475 | 450.6457 | 455.5319 |
| C | 1.210546  | -0.208107 | -3.418994 | 465.3307 | 467.6869 | 469.7251 |
| C | 0.011207  | 0.53389   | -3.478606 | 486.4248 | 502.8398 | 508.3666 |
| C | -1.196123 | -0.197864 | -3.424545 | 508.7935 | 510.4007 | 530.4667 |
| C | -0.002834 | -2.23414  | -2.731903 | 531.2082 | 536.1091 | 537.7683 |
| C | 1.204237  | -1.571024 | -3.050892 | 551.0444 | 553.3347 | 553.6616 |
| C | -1.205508 | -1.565105 | -3.057225 | 555.1793 | 557.0668 | 558.2514 |
| C | 3.267527  | 1.857558  | 1.502426  | 561.2763 | 561.9116 | 564.2196 |
| C | 2.476909  | 2.861861  | 0.823989  | 566.7065 | 571.8245 | 573.6227 |
| C | 4.05274   | 0.955822  | 0.782598  | 575.0075 | 591.8524 | 593.5071 |
| C | 2.480362  | 2.929985  | -0.545412 | 599.5118 | 604.8116 | 608.0786 |
| C | 1.228305  | 3.193862  | -1.251024 | 609.6011 | 621.6593 | 630.6945 |
| C | 0.023691  | 3.484533  | -0.56845  | 650.7549 | 650.894  | 658.7007 |
| C | -1.181443 | 3.201596  | -1.24912  | 658.914  | 662.9931 | 688.5321 |
| C | 0.018559  | 1.903092  | -2.959282 | 688.6117 | 698.2782 | 698.6089 |
| C | 1.224397  | 2.413085  | -2.428695 | 700.1695 | 701.4949 | 726.2258 |
| C | -1.181945 | 2.421736  | -2.427735 | 728.6689 | 736.4522 | 740.6106 |
| C | 3.245072  | -0.859226 | 2.240095  | 742.7453 | 743.8586 | 749.0615 |
| C | 2.455641  | 0.095722  | 2.983064  | 751.3378 | 752.8059 | 754.0394 |
| C | 4.031751  | -0.453641 | 1.164291  | 755.8455 | 759.9197 | 765.2843 |
| C | 2.465515  | 1.416099  | 2.622643  | 766.4783 | 766.6567 | 768.2967 |
| C | 1.217689  | 2.169408  | 2.64676   | 771.9428 | 773.5999 | 774.6834 |
| C | 0.011497  | 1.613036  | 3.126503  | 776.0358 | 777.2133 | 777.9343 |

|   |           |           |           |           |           |           |
|---|-----------|-----------|-----------|-----------|-----------|-----------|
| C | -1.187503 | 2.179175  | 2.642785  | 778.689   | 788.6228  | 789.1812  |
| C | 0.021951  | 3.413379  | 0.895032  | 789.5975  | 792.1321  | 792.6132  |
| C | 1.223801  | 3.05694   | 1.548348  | 794.2463  | 795.5147  | 804.3886  |
| C | -1.184205 | 3.066987  | 1.543175  | 804.4485  | 805.5566  | 805.9535  |
| C | 3.233419  | -2.397086 | -0.111159 | 808.9378  | 809.1323  | 812.2968  |
| C | 2.440671  | -2.811331 | 1.023944  | 822.704   | 822.9252  | 858.6661  |
| C | 4.020893  | -1.25001  | -0.055605 | 858.9115  | 895.4422  | 919.5947  |
| C | 2.446188  | -2.062152 | 2.169582  | 940.3519  | 942.1837  | 947.4014  |
| C | 1.196521  | -1.852315 | 2.891026  | 948.8737  | 965.6976  | 994.8986  |
| C | -0.009596 | -2.480836 | 2.506369  | 995.2435  | 1072.7392 | 1074.8107 |
| C | -1.213361 | -1.847191 | 2.892776  | 1075.5056 | 1078.0243 | 1098.0611 |
| C | 0.0026    | 0.201677  | 3.516776  | 1117.432  | 1117.5906 | 1149.8668 |
| C | 1.202636  | -0.531023 | 3.388925  | 1150.0954 | 1164.4735 | 1168.2291 |
| C | -1.205682 | -0.521774 | 3.391615  | 1191.3758 | 1208.7932 | 1209.3233 |
| C | -0.013748 | -3.280715 | 1.279012  | 1230.2859 | 1230.8263 | 1234.8362 |
| C | 1.189009  | -3.386849 | 0.546244  | 1239.9791 | 1240.0741 | 1245.0888 |
| C | -1.216793 | -3.375245 | 0.545512  | 1267.9779 | 1276.9811 | 1277.9235 |
| C | -3.25174  | -0.835221 | 2.239726  | 1279.1116 | 1292.5983 | 1301.5488 |
| C | -2.467441 | -2.049141 | 2.171368  | 1304.0637 | 1306.0874 | 1306.7811 |
| C | -2.46729  | -2.794849 | 1.021175  | 1311.8593 | 1312.1221 | 1312.7361 |
| C | -4.020954 | -0.421052 | 1.154938  | 1313.4833 | 1337.4695 | 1338.0524 |
| C | -3.234047 | 1.88481   | 1.493287  | 1362.3285 | 1363.3633 | 1363.9658 |
| C | -2.442022 | 1.436389  | 2.616618  | 1364.7048 | 1375.7526 | 1381.5446 |
| C | -2.452527 | 0.115274  | 2.982685  | 1384.9023 | 1386.4752 | 1387.1739 |
| C | -4.012323 | 0.983899  | 0.771072  | 1399.116  | 1399.3308 | 1400.4244 |
| C | -3.231692 | 2.0198    | -1.315771 | 1408.8413 | 1410.2523 | 1415.9317 |

|                 |   |           |           |           |           |           |           |
|-----------------|---|-----------|-----------|-----------|-----------|-----------|-----------|
|                 | C | -2.436502 | 2.954561  | -0.548171 | 1416.3162 | 1427.8362 | 1430.841  |
|                 | C | -2.43743  | 2.888233  | 0.819177  | 1431.2135 | 1456.1534 | 1456.9378 |
|                 | C | -4.010753 | 1.05374   | -0.683405 | 1477.6624 | 1478.9393 | 1483.1786 |
|                 | C | -3.244025 | -0.618645 | -2.313481 | 1483.1943 | 1496.8085 | 1503.6912 |
|                 | C | -2.442775 | 0.397855  | -2.959513 | 1507.3018 | 1509.87   | 1511.3751 |
|                 | C | -2.436025 | 1.67951   | -2.473556 | 1511.9607 | 1529.4852 | 1557.4803 |
|                 | C | -4.016681 | -0.308674 | -1.197176 | 1557.8481 | 1592.7471 | 1594.9862 |
|                 | C | -3.258605 | -2.379664 | -0.116779 | 1597.0825 | 1601.2563 | 1603.4642 |
|                 | C | -2.465993 | -2.688078 | -1.288263 | 1609.1855 | 1611.5238 | 1624.9978 |
|                 | C | -2.461864 | -1.835142 | -2.361462 | 1626.089  | 1636.1111 | 1636.4648 |
|                 | C | -4.026215 | -1.220551 | -0.061816 | 1671.4603 | 1680.5316 | 1681.1594 |
|                 | S | -1.467508 | 0.067912  | -0.001445 | 1684.0204 | 1685.235  | 1690.0543 |
|                 | H | -0.824648 | -0.532257 | 0.997648  | 1696.3858 | 1696.6148 | 1699.7369 |
|                 | S | 1.220437  | -0.116498 | 0.009519  | 1700.9708 | 1706.904  | 2842.0831 |
|                 | H | 2.446236  | 0.319941  | -0.036362 | 2857.8012 | 2908.5926 | 3126.4357 |
|                 | H | 0.731106  | 1.110611  | -0.092104 |           |           |           |
|                 | H | -0.828122 | -0.623935 | -0.941414 |           |           |           |
| C <sub>84</sub> | C | 2.555232  | -1.833413 | 2.772631  | 215.9142  | 216.3442  | 221.5773  |
|                 | C | 3.207492  | -2.202534 | 1.574766  | 226.655   | 226.8816  | 275.7223  |
|                 | C | 2.602372  | -3.244344 | 0.85788   | 280.6094  | 282.8491  | 286.2507  |
|                 | C | 1.284003  | -2.326374 | 3.117419  | 289.0624  | 294.0262  | 295.3489  |
|                 | C | 0.609399  | -3.268825 | 2.324258  | 336.1633  | 339.4951  | 349.1083  |
|                 | C | 1.347625  | -3.77973  | 1.23379   | 353.0798  | 356.9374  | 359.5874  |
|                 | C | 3.971566  | -1.181849 | 0.845636  | 366.6584  | 369.393   | 372.0628  |
|                 | C | 4.054812  | -1.267356 | -0.558417 | 373.6112  | 377.4828  | 384.9805  |

|   |           |           |           |          |          |          |
|---|-----------|-----------|-----------|----------|----------|----------|
| C | 2.629083  | -0.474787 | 3.266497  | 386.5357 | 387.3184 | 431.7355 |
| C | 3.338756  | 0.46517   | 2.602714  | 444.9527 | 447.9529 | 449.5174 |
| C | 4.046721  | 0.121248  | 1.378929  | 458.4898 | 463.1484 | 463.891  |
| C | 1.369841  | -0.122442 | 3.868875  | 467.2131 | 472.1021 | 481.1655 |
| C | 0.840697  | 1.182213  | 3.736357  | 491.4756 | 493.764  | 494.3805 |
| C | -0.551728 | 1.27126   | 3.812558  | 497.7808 | 505.4366 | 507.6262 |
| C | -0.840684 | -1.182183 | 3.736369  | 514.846  | 515.8623 | 516.8202 |
| C | 0.551742  | -1.27123  | 3.812566  | 517.4503 | 518.0916 | 520.4639 |
| C | -1.369827 | 0.122473  | 3.868879  | 529.5157 | 530.0199 | 534.0049 |
| C | -1.582046 | -2.191977 | 2.975909  | 535.1369 | 537.5195 | 541.443  |
| C | -1.455003 | -3.782533 | 1.122212  | 544.7296 | 549.7484 | 561.3055 |
| C | -0.854316 | -3.227425 | 2.258845  | 589.3903 | 595.3881 | 601.4759 |
| C | -2.845545 | -1.823432 | 2.498584  | 602.7113 | 617.0179 | 623.9972 |
| C | 3.369452  | 2.332456  | 1.277796  | 624.328  | 625.859  | 643.2671 |
| C | 4.054816  | 1.26735   | 0.558403  | 645.7429 | 648.1837 | 650.3694 |
| C | 3.971565  | 1.181843  | -0.84565  | 653.5826 | 662.841  | 662.9381 |
| C | 4.046716  | -0.121254 | -1.378944 | 665.6778 | 665.9357 | 673.5262 |
| C | 2.680791  | 3.289789  | 0.596022  | 675.8797 | 675.9168 | 677.1059 |
| C | 1.582057  | 2.192     | 2.975886  | 678.4477 | 679.9646 | 685.9975 |
| C | 2.845554  | 1.823453  | 2.49856   | 691.4362 | 700.2536 | 700.7639 |
| C | 1.455007  | 3.782542  | 1.122176  | 701.1818 | 703.6997 | 704.0228 |
| C | 0.854325  | 3.227443  | 2.258817  | 705.1492 | 710.8191 | 711.3514 |
| C | 2.602373  | 3.24434   | -0.857889 | 719.8697 | 722.0236 | 725.4373 |
| C | 3.20749   | 2.202529  | -1.574778 | 726.1616 | 729.6415 | 734.534  |
| C | 2.555225  | 1.833409  | -2.772641 | 735.2215 | 737.5679 | 737.9414 |
| C | 2.629073  | 0.474783  | -3.266508 | 740.1822 | 740.6512 | 744.7344 |

|   |           |           |           |           |           |           |
|---|-----------|-----------|-----------|-----------|-----------|-----------|
| C | 3.338746  | -0.465174 | -2.602725 | 747.0629  | 747.8247  | 747.8998  |
| C | -0.674624 | 4.193718  | 0.023593  | 751.1151  | 752.0606  | 752.2499  |
| C | 0.67463   | 4.193718  | -0.023627 | 752.7527  | 755.4039  | 758.7223  |
| C | 1.347626  | 3.779728  | -1.233794 | 761.6962  | 764.9427  | 766.1969  |
| C | 0.609396  | 3.268824  | -2.324261 | 768.1972  | 771.799   | 772.5624  |
| C | 1.283995  | 2.326372  | -3.117423 | 778.7373  | 784.0249  | 797.2661  |
| C | -1.283991 | 2.326399  | 3.117405  | 800.355   | 820.8716  | 838.2333  |
| C | -0.609391 | 3.268843  | 2.324234  | 847.4089  | 853.1994  | 853.8782  |
| C | -1.347621 | 3.77974   | 1.233764  | 869.8824  | 887.4176  | 887.9697  |
| C | 2.680785  | -3.289794 | -0.596032 | 893.4937  | 899.4523  | 910.9782  |
| C | 3.369444  | -2.332461 | -1.277808 | 933.6069  | 933.6166  | 939.9528  |
| C | 2.845542  | -1.823457 | -2.49857  | 967.9573  | 1046.2089 | 1049.6953 |
| C | 1.369827  | 0.12244   | -3.86888  | 1051.4368 | 1059.3172 | 1060.1209 |
| C | -0.551744 | -1.27126  | -3.812555 | 1064.0661 | 1066.8994 | 1078.9645 |
| C | 0.840682  | -1.182214 | -3.73636  | 1085.9905 | 1159.1097 | 1161.8588 |
| C | 1.582042  | -2.192002 | -2.975891 | 1164.3133 | 1172.1713 | 1175.1371 |
| C | 0.854312  | -3.227445 | -2.25882  | 1182.625  | 1200.3938 | 1202.4594 |
| C | 1.454997  | -3.782544 | -1.122182 | 1216.8339 | 1218.5047 | 1223.4234 |
| C | -1.455001 | 3.782535  | -1.122207 | 1228.3113 | 1237.5824 | 1258.2615 |
| C | -0.854319 | 3.227426  | -2.258842 | 1269.3021 | 1270.6721 | 1272.809  |
| C | -1.582053 | 2.191978  | -2.975903 | 1281.6382 | 1284.908  | 1303.5093 |
| C | -0.840695 | 1.182184  | -3.736366 | 1304.9529 | 1306.7001 | 1308.8186 |
| C | 0.55173   | 1.271229  | -3.812567 | 1313.5299 | 1317.9484 | 1322.9866 |
| C | -1.369841 | -0.122471 | -3.868874 | 1326.7816 | 1328.0051 | 1332.4293 |
| C | -1.284006 | -2.326397 | -3.1174   | 1344.9996 | 1346.334  | 1352.6269 |
| C | -0.609404 | -3.268842 | -2.324232 | 1355.2985 | 1366.3824 | 1383.9265 |



|                                                  |   |           |           |           |           |           |           |
|--------------------------------------------------|---|-----------|-----------|-----------|-----------|-----------|-----------|
|                                                  | C | -1.347631 | -3.779738 | -1.23376  | 1384.8309 | 1386.6545 | 1393.4094 |
|                                                  | C | -0.67463  | -4.193717 | -0.023591 | 1393.8971 | 1399.1876 | 1403.1704 |
|                                                  | C | 0.674624  | -4.193719 | 0.023624  | 1405.9929 | 1409.4079 | 1411.7522 |
|                                                  | C | -3.338755 | 0.465154  | -2.602717 | 1416.4718 | 1420.259  | 1426.1767 |
|                                                  | C | -2.629084 | -0.474809 | -3.266494 | 1429.6307 | 1430.1821 | 1435.0743 |
|                                                  | C | -2.555234 | -1.833431 | -2.772617 | 1438.0281 | 1438.1428 | 1441.4768 |
|                                                  | C | -3.207496 | -2.202542 | -1.574749 | 1444.4792 | 1450.7035 | 1455.9402 |
|                                                  | C | -2.602376 | -3.244346 | -0.857854 | 1459.8309 | 1463.4239 | 1469.9804 |
|                                                  | C | -2.680787 | 3.289789  | -0.596048 | 1475.5753 | 1477.5069 | 1484.8356 |
|                                                  | C | -3.369449 | 2.332451  | -1.277815 | 1491.2405 | 1500.3778 | 1511.8526 |
|                                                  | C | -2.845551 | 1.823436  | -2.498574 | 1515.6177 | 1526.9464 | 1527.35   |
|                                                  | C | -2.555221 | 1.833435  | 2.772626  | 1530.0115 | 1533.623  | 1551.0812 |
|                                                  | C | -3.207487 | 2.202546  | 1.57476   | 1573.6305 | 1587.0478 | 1589.1534 |
|                                                  | C | -2.602369 | 3.24435   | 0.857863  | 1594.8921 | 1599.6413 | 1612.708  |
|                                                  | C | -4.046717 | -0.121238 | 1.378945  | 1613.6413 | 1615.5844 | 1632.5913 |
|                                                  | C | -3.338747 | -0.465149 | 2.60273   | 1639.8703 | 1643.9774 | 1647.2126 |
|                                                  | C | -2.629071 | 0.474813  | 3.266503  | 1647.8765 | 1654.395  | 1659.1308 |
|                                                  | C | -4.054814 | 1.267352  | -0.558413 | 1660.0323 | 1670.9144 | 1671.2863 |
|                                                  | C | -3.971564 | 1.181856  | 0.845641  | 1678.3459 | 1688.517  | 1710.0811 |
|                                                  | C | -2.680789 | -3.289784 | 0.596057  | 1719.2714 | 1719.4997 | 1719.6048 |
|                                                  | C | -4.046721 | 0.121243  | -1.37893  | 1748.9838 | 1750.1662 | 1756.9378 |
|                                                  | C | -3.971569 | -1.18185  | -0.845627 | 1759.806  | 1765.4457 | 1768.4121 |
|                                                  | C | -4.054814 | -1.267346 | 0.558428  |           |           |           |
|                                                  | C | -3.369448 | -2.332447 | 1.277827  |           |           |           |
| (H <sub>2</sub> S) <sub>2</sub> @C <sub>84</sub> | C | -2.626321 | 1.885699  | 2.685318  | 41.0582   | 52.3885   | 75.8602   |
|                                                  | C | -3.247701 | 2.266724  | 1.47273   | 100.5679  | 125.4373  | 134.2129  |

|   |           |           |           |          |          |          |
|---|-----------|-----------|-----------|----------|----------|----------|
| C | -2.577268 | 3.286956  | 0.7769    | 207.2231 | 214.4304 | 215.0242 |
| C | -1.34756  | 2.347628  | 3.063116  | 237.3754 | 239.4936 | 241.5371 |
| C | -0.618747 | 3.269475  | 2.295956  | 273.6738 | 277.0282 | 283.4756 |
| C | -1.31635  | 3.791253  | 1.187397  | 288.0573 | 301.4092 | 309.5115 |
| C | -4.04528  | 1.268317  | 0.727262  | 311.2417 | 327.6547 | 330.2791 |
| C | -4.069349 | 1.355359  | -0.684668 | 335.4692 | 340.2372 | 349.5296 |
| C | -2.743713 | 0.528462  | 3.172694  | 352.7047 | 360.508  | 367.4526 |
| C | -3.472341 | -0.392754 | 2.495325  | 370.287  | 371.6769 | 374.7782 |
| C | -4.177211 | -0.039144 | 1.262242  | 380.6552 | 386.6908 | 392.9957 |
| C | -1.500492 | 0.152367  | 3.803597  | 400.5514 | 401.6949 | 411.2888 |
| C | -0.987938 | -1.157809 | 3.688701  | 433.2662 | 449.8702 | 454.0558 |
| C | 0.403593  | -1.272253 | 3.806052  | 456.2012 | 467.1815 | 467.8665 |
| C | 0.743231  | 1.166191  | 3.739781  | 469.1849 | 471.9969 | 488.8054 |
| C | -0.653068 | 1.280862  | 3.77303   | 489.7186 | 492.2549 | 502.5437 |
| C | 1.24557   | -0.143769 | 3.887282  | 505.7849 | 506.425  | 508.9357 |
| C | 1.539571  | 2.153866  | 3.009506  | 509.7194 | 512.9076 | 515.3264 |
| C | 1.501689  | 3.737447  | 1.163384  | 515.6459 | 518.0826 | 522.7332 |
| C | 0.849561  | 3.198849  | 2.276443  | 522.9695 | 526.0745 | 532.1433 |
| C | 2.817536  | 1.763764  | 2.575589  | 532.9186 | 533.5972 | 536.2541 |
| C | -3.495592 | -2.261163 | 1.168941  | 540.4339 | 546.4306 | 552.4341 |
| C | -4.179526 | -1.192179 | 0.437303  | 555.3168 | 563.3039 | 572.2789 |
| C | -4.03176  | -1.106365 | -0.969918 | 590.881  | 600.7406 | 601.3267 |
| C | -4.052397 | 0.203815  | -1.506412 | 606.2861 | 617.0376 | 624.4037 |
| C | -2.783029 | -3.222499 | 0.509936  | 625.1217 | 638.2928 | 643.7163 |
| C | -1.735098 | -2.146429 | 2.910283  | 645.9325 | 648.8072 | 654.1444 |
| C | -2.986214 | -1.756927 | 2.399859  | 663.9254 | 670.4853 | 673.9007 |

|   |           |           |           |           |           |           |
|---|-----------|-----------|-----------|-----------|-----------|-----------|
| C | -1.57608  | -3.731815 | 1.070037  | 677.2746  | 680.4963  | 682.7491  |
| C | -0.997977 | -3.192023 | 2.221629  | 683.4747  | 689.5267  | 692.1347  |
| C | -2.654812 | -3.182067 | -0.939286 | 697.9387  | 699.4717  | 699.6704  |
| C | -3.231207 | -2.133781 | -1.67148  | 706.8384  | 711.5968  | 712.1131  |
| C | -2.514374 | -1.777312 | -2.839728 | 715.3839  | 728.9645  | 731.4062  |
| C | -2.541123 | -0.41902  | -3.331932 | 733.4701  | 734.8587  | 736.5021  |
| C | -3.267949 | 0.529262  | -2.696168 | 740.4315  | 741.1478  | 751.2053  |
| C | 0.588798  | -4.184477 | 0.042209  | 751.868   | 758.6288  | 762.8611  |
| C | -0.760782 | -4.155808 | -0.045524 | 765.3029  | 765.7741  | 768.1644  |
| C | -1.390957 | -3.734226 | -1.272395 | 769.4081  | 773.4047  | 778.4166  |
| C | -0.601046 | -3.241649 | -2.33259  | 778.8844  | 783.5704  | 784.0152  |
| C | -1.237483 | -2.2912   | -3.142038 | 785.7944  | 787.1376  | 791.9345  |
| C | 1.141611  | -2.338163 | 3.139432  | 794.9455  | 796.8473  | 798.1352  |
| C | 0.466547  | -3.263032 | 2.330484  | 798.4358  | 800.8909  | 803.3515  |
| C | 1.23555   | -3.786828 | 1.269251  | 804.5793  | 805.26    | 805.9054  |
| C | -2.604555 | 3.332269  | -0.676852 | 807.3762  | 807.5227  | 809.4186  |
| C | -3.305871 | 2.395058  | -1.376382 | 811.0983  | 822.3152  | 838.1964  |
| C | -2.742337 | 1.873642  | -2.575223 | 845.4194  | 847.1787  | 854.872   |
| C | -1.250731 | -0.09373  | -3.889972 | 863.032   | 884.121   | 888.6604  |
| C | 0.705575  | 1.25465   | -3.775529 | 891.0291  | 897.4661  | 908.6917  |
| C | -0.694732 | 1.195044  | -3.74344  | 931.2633  | 932.3846  | 932.704   |
| C | -1.449345 | 2.214635  | -3.011547 | 967.1117  | 1039.3619 | 1042.1194 |
| C | -0.717432 | 3.231765  | -2.277354 | 1046.6452 | 1048.5049 | 1055.6205 |
| C | -1.346924 | 3.794578  | -1.162053 | 1063.1286 | 1066.7393 | 1076.0554 |
| C | 1.420252  | -3.791907 | -1.073186 | 1079.0835 | 1150.3906 | 1158.6405 |
| C | 0.864844  | -3.228695 | -2.224776 | 1160.491  | 1162.3906 | 1163.7353 |

|   |           |           |           |           |           |           |
|---|-----------|-----------|-----------|-----------|-----------|-----------|
| C | 1.645262  | -2.214151 | -2.913059 | 1181.6608 | 1191.4296 | 1200.3515 |
| C | 0.939402  | -1.196522 | -3.692437 | 1206.7115 | 1208.4607 | 1212.9974 |
| C | -0.455575 | -1.255758 | -3.808113 | 1214.2967 | 1217.5799 | 1221.1629 |
| C | 1.506048  | 0.092386  | -3.807205 | 1223.4801 | 1253.2202 | 1254.8786 |
| C | 1.442209  | 2.292123  | -3.064464 | 1256.7201 | 1268.361  | 1268.7383 |
| C | 0.752634  | 3.242754  | -2.295955 | 1280.9474 | 1291.1443 | 1298.4851 |
| C | 1.469678  | 3.735729  | -1.186696 | 1299.774  | 1304.2261 | 1311.0097 |
| C | 0.761163  | 4.159424  | -0.002054 | 1312.5217 | 1315.9088 | 1320.8234 |
| C | -0.590989 | 4.18814   | 0.003566  | 1321.4945 | 1328.1653 | 1333.5126 |
| C | 3.45236   | -0.531082 | -2.497391 | 1336.5243 | 1337.4797 | 1345.9089 |
| C | 2.764219  | 0.418474  | -3.17689  | 1358.418  | 1371.2078 | 1375.3387 |
| C | 2.700464  | 1.778344  | -2.685624 | 1377.5739 | 1378.8098 | 1384.9766 |
| C | 3.338768  | 2.13605   | -1.472775 | 1386.6571 | 1394.0063 | 1394.5956 |
| C | 2.709207  | 3.181198  | -0.775182 | 1401.8825 | 1407.7931 | 1407.9337 |
| C | 2.645823  | -3.329177 | -0.513007 | 1412.5833 | 1414.7825 | 1420.5011 |
| C | 3.393748  | -2.394964 | -1.170267 | 1425.6809 | 1431.1767 | 1431.8738 |
| C | 2.910025  | -1.873891 | -2.402629 | 1433.068  | 1437.0296 | 1439.6273 |
| C | 2.438505  | -1.874694 | 2.837014  | 1443.8063 | 1446.8331 | 1451.7864 |
| C | 3.138157  | -2.258115 | 1.668059  | 1456.3559 | 1465.5472 | 1466.4557 |
| C | 2.520175  | -3.283289 | 0.935941  | 1472.6587 | 1474.6255 | 1486.5667 |
| C | 4.061895  | 0.044198  | 1.507722  | 1496.2636 | 1506.4976 | 1507.0141 |
| C | 3.287343  | 0.399628  | 2.696018  | 1520.1828 | 1523.566  | 1526.8986 |
| C | 2.522093  | -0.519255 | 3.330415  | 1533.1637 | 1544.9813 | 1561.2573 |
| C | 4.117835  | -1.354478 | -0.438365 | 1574.1862 | 1584.9756 | 1588.8322 |
| C | 3.977884  | -1.262354 | 0.967897  | 1592.6643 | 1593.4919 | 1597.1892 |
| C | 2.740526  | 3.227143  | 0.679117  | 1606.4233 | 1614.3191 | 1624.8018 |

|   |           |           |           |           |           |           |
|---|-----------|-----------|-----------|-----------|-----------|-----------|
| C | 4.169168  | -0.204829 | -1.263577 | 1635.7654 | 1638.8281 | 1641.6599 |
| C | 4.098142  | 1.10733   | -0.726566 | 1644.7495 | 1649.2941 | 1659.1899 |
| C | 4.130132  | 1.195024  | 0.687273  | 1662.5721 | 1666.2523 | 1671.8478 |
| C | 3.40444   | 2.263399  | 1.378659  | 1680.1332 | 1697.8968 | 1708.259  |
| S | -1.482059 | -0.13234  | 0.097758  | 1710.4446 | 1713.4142 | 1736.0891 |
| H | -0.787591 | 0.486134  | 1.055313  | 1737.4039 | 1747.7395 | 1749.5337 |
| S | 1.499235  | 0.055259  | -0.031229 | 1756.3282 | 1759.5408 | 2806.9427 |
| H | 0.888623  | 0.158088  | -1.213516 | 2822.2182 | 2829.7695 | 2838.9906 |
| H | 0.900702  | -1.103821 | 0.250702  |           |           |           |
| H | -1.168496 | 0.794694  | -0.81279  |           |           |           |

Table S2: Natural population analysis of (H<sub>2</sub>S)<sub>2</sub>@C<sub>60</sub>

| Atom | charge  | core   | valence | rydberg | total   |
|------|---------|--------|---------|---------|---------|
| C    | -0.0424 | 1.9987 | 4.0170  | 0.0267  | 6.0424  |
| C    | -0.0587 | 1.9987 | 4.0319  | 0.0280  | 6.0587  |
| C    | -0.0620 | 1.9988 | 4.0444  | 0.0188  | 6.0620  |
| C    | 0.0415  | 1.9988 | 3.9413  | 0.0185  | 5.9585  |
| C    | -0.0437 | 1.9987 | 4.0156  | 0.0294  | 6.0437  |
| C    | -0.0223 | 1.9987 | 4.0031  | 0.0204  | 6.0223  |
| C    | -0.0080 | 1.9987 | 3.9836  | 0.0257  | 6.0080  |
| C    | -0.0307 | 1.9987 | 4.0095  | 0.0225  | 6.0307  |
| C    | 0.0431  | 1.9988 | 3.9422  | 0.0160  | 5.9569  |
| C    | -0.0241 | 1.9987 | 4.0030  | 0.0224  | 6.0241  |
| C    | 0.0145  | 1.9987 | 3.9713  | 0.0155  | 5.9855  |
| C    | -0.0597 | 1.9988 | 4.0330  | 0.0280  | 6.0597  |
| C    | 0.0297  | 1.9987 | 3.9545  | 0.0171  | 5.9703  |
| C    | -0.0538 | 1.9988 | 4.0288  | 0.0263  | 6.0538  |
| C    | -0.0850 | 1.9987 | 4.0619  | 0.0244  | 6.0850  |
| C    | -0.0192 | 1.9987 | 3.9954  | 0.0251  | 6.0192  |
| C    | -0.0625 | 1.9988 | 4.0402  | 0.0235  | 6.0625  |
| C    | -0.0668 | 1.9987 | 4.0370  | 0.0311  | 6.0668  |
| C    | 0.0271  | 1.9987 | 3.9556  | 0.0186  | 5.9729  |
| C    | 0.0009  | 1.9987 | 3.9802  | 0.0202  | 5.9991  |
| C    | -0.0159 | 1.9988 | 3.9925  | 0.0247  | 6.0159  |
| C    | 0.0002  | 1.9987 | 3.9843  | 0.0168  | 5.9998  |
| C    | -0.0104 | 1.9988 | 3.9878  | 0.0239  | 6.0104  |
| C    | -0.0545 | 1.9987 | 4.0315  | 0.0243  | 6.0545  |
| C    | -0.1282 | 1.9988 | 4.1037  | 0.0257  | 6.1282  |
| C    | 0.0059  | 1.9987 | 3.9727  | 0.0227  | 5.9941  |
| C    | -0.0273 | 1.9987 | 4.0122  | 0.0164  | 6.0273  |
| C    | -0.0282 | 1.9987 | 4.0033  | 0.0261  | 6.0282  |
| C    | -0.0154 | 1.9987 | 3.9934  | 0.0233  | 6.0154  |
| C    | -0.0368 | 1.9987 | 4.0125  | 0.0256  | 6.0368  |
| C    | -0.0152 | 1.9987 | 3.9925  | 0.0240  | 6.0152  |
| C    | -0.0046 | 1.9986 | 3.9896  | 0.0164  | 6.0046  |
| C    | -0.0729 | 1.9988 | 4.0451  | 0.0290  | 6.0729  |
| C    | -0.0473 | 1.9987 | 4.0232  | 0.0254  | 6.0473  |
| C    | -0.0689 | 1.9987 | 4.0444  | 0.0258  | 6.0689  |
| C    | 0.0344  | 1.9987 | 3.9521  | 0.0148  | 5.9656  |
| C    | -0.0530 | 1.9987 | 4.0266  | 0.0277  | 6.0530  |
| C    | 0.0361  | 1.9987 | 3.9504  | 0.0148  | 5.9639  |
| C    | -0.0151 | 1.9987 | 3.9923  | 0.0240  | 6.0151  |
| C    | -0.0186 | 1.9987 | 4.0001  | 0.0198  | 6.0186  |
| C    | -0.0528 | 1.9987 | 4.0290  | 0.0252  | 6.0528  |
| C    | -0.0976 | 1.9987 | 4.0718  | 0.0271  | 6.0976  |
| C    | 0.0430  | 1.9987 | 3.9430  | 0.0153  | 5.9570  |
| C    | -0.0268 | 1.9987 | 4.0010  | 0.0272  | 6.0268  |
| C    | -0.0136 | 1.9987 | 3.9981  | 0.0168  | 6.0136  |
| C    | -0.0228 | 1.9987 | 4.0007  | 0.0233  | 6.0228  |
| C    | 0.0218  | 1.9988 | 3.9591  | 0.0203  | 5.9782  |
| C    | -0.0673 | 1.9987 | 4.0458  | 0.0227  | 6.0673  |
| C    | -0.0330 | 1.9988 | 4.0092  | 0.0251  | 6.0330  |
| C    | -0.0405 | 1.9988 | 4.0170  | 0.0248  | 6.0405  |
| C    | 0.0046  | 1.9987 | 3.9810  | 0.0157  | 5.9954  |
| C    | -0.0153 | 1.9988 | 3.9953  | 0.0212  | 6.0153  |
| C    | -0.0440 | 1.9987 | 4.0226  | 0.0227  | 6.0440  |
| C    | 0.0336  | 1.9987 | 3.9522  | 0.0155  | 5.9664  |
| C    | -0.0251 | 1.9988 | 4.0013  | 0.0251  | 6.0251  |
| C    | -0.0053 | 1.9987 | 3.9859  | 0.0207  | 6.0053  |
| C    | -0.0517 | 1.9987 | 4.0305  | 0.0226  | 6.0517  |
| C    | -0.0069 | 1.9987 | 3.9881  | 0.0201  | 6.0069  |
| C    | -0.0476 | 1.9987 | 4.0235  | 0.0254  | 6.0476  |
| C    | 0.0148  | 1.9987 | 3.9709  | 0.0156  | 5.9852  |
| S    | 0.3128  | 9.9986 | 5.5968  | 0.0918  | 15.6873 |
| H    | 0.1967  | 0.0000 | 0.7969  | 0.0065  | 0.8033  |
| S    | 0.3220  | 9.9986 | 5.5783  | 0.1011  | 15.6780 |
| H    | 0.1937  | 0.0000 | 0.8009  | 0.0054  | 0.8063  |
| H    | 0.2072  | 0.0000 | 0.7876  | 0.0052  | 0.7928  |
| H    | 0.2184  | 0.0000 | 0.7753  | 0.0064  | 0.7817  |

Table S3: Natural population analysis of (H<sub>2</sub>S)<sub>2</sub>@C<sub>70</sub>

| Atom | charge  | core   | valence | rydberg | total   |
|------|---------|--------|---------|---------|---------|
| C    | 0.0307  | 1.9987 | 3.9557  | 0.0149  | 5.9693  |
| C    | 0.0034  | 1.9987 | 3.9765  | 0.0214  | 5.9966  |
| C    | -0.0249 | 1.9987 | 3.9989  | 0.0272  | 6.0249  |
| C    | 0.0020  | 1.9987 | 3.9774  | 0.0219  | 5.9980  |
| C    | -0.0174 | 1.9988 | 3.9953  | 0.0232  | 6.0174  |
| C    | 0.0247  | 1.9988 | 3.9621  | 0.0145  | 5.9753  |
| C    | -0.0227 | 1.9988 | 4.0004  | 0.0235  | 6.0227  |
| C    | -0.0277 | 1.9988 | 4.0032  | 0.0258  | 6.0277  |
| C    | 0.0047  | 1.9987 | 3.9768  | 0.0197  | 5.9953  |
| C    | 0.0180  | 1.9987 | 3.9673  | 0.0161  | 5.9820  |
| C    | 0.0089  | 1.9987 | 3.9711  | 0.0213  | 5.9911  |
| C    | -0.0070 | 1.9988 | 3.9878  | 0.0204  | 6.0070  |
| C    | 0.0278  | 1.9988 | 3.9591  | 0.0143  | 5.9723  |
| C    | -0.0330 | 1.9989 | 4.0091  | 0.0251  | 6.0330  |
| C    | -0.0249 | 1.9989 | 4.0027  | 0.0233  | 6.0249  |
| C    | 0.0042  | 1.9988 | 3.9783  | 0.0187  | 5.9958  |
| C    | 0.0189  | 1.9988 | 3.9676  | 0.0147  | 5.9811  |
| C    | -0.0096 | 1.9987 | 3.9897  | 0.0212  | 6.0096  |
| C    | -0.0098 | 1.9988 | 3.9867  | 0.0243  | 6.0098  |
| C    | -0.0283 | 1.9987 | 4.0022  | 0.0275  | 6.0283  |
| C    | 0.0361  | 1.9987 | 3.9496  | 0.0156  | 5.9639  |
| C    | -0.0297 | 1.9988 | 4.0073  | 0.0236  | 6.0297  |
| C    | 0.0232  | 1.9988 | 3.9636  | 0.0144  | 5.9768  |
| C    | -0.0142 | 1.9988 | 3.9940  | 0.0215  | 6.0142  |
| C    | -0.0190 | 1.9989 | 3.9969  | 0.0233  | 6.0190  |
| C    | -0.0021 | 1.9988 | 3.9848  | 0.0186  | 6.0021  |
| C    | 0.0316  | 1.9988 | 3.9554  | 0.0142  | 5.9684  |
| C    | 0.0214  | 1.9987 | 3.9631  | 0.0168  | 5.9786  |
| C    | 0.0080  | 1.9987 | 3.9709  | 0.0224  | 5.9920  |
| C    | 0.0206  | 1.9987 | 3.9609  | 0.0198  | 5.9794  |
| C    | 0.0075  | 1.9987 | 3.9739  | 0.0198  | 5.9925  |
| C    | -0.0137 | 1.9988 | 3.9934  | 0.0214  | 6.0137  |
| C    | 0.0265  | 1.9988 | 3.9604  | 0.0143  | 5.9735  |
| C    | -0.0101 | 1.9988 | 3.9899  | 0.0214  | 6.0101  |
| C    | -0.0216 | 1.9989 | 3.9992  | 0.0236  | 6.0216  |
| C    | 0.0220  | 1.9988 | 3.9651  | 0.0141  | 5.9780  |
| C    | -0.0010 | 1.9988 | 3.9834  | 0.0187  | 6.0010  |
| C    | 0.0197  | 1.9987 | 3.9658  | 0.0158  | 5.9804  |
| C    | -0.0089 | 1.9988 | 3.9853  | 0.0248  | 6.0089  |
| C    | -0.0232 | 1.9987 | 3.9968  | 0.0276  | 6.0232  |
| C    | 0.0004  | 1.9987 | 3.9779  | 0.0230  | 5.9996  |
| C    | -0.0051 | 1.9988 | 3.9851  | 0.0212  | 6.0051  |
| C    | 0.0225  | 1.9988 | 3.9642  | 0.0145  | 5.9775  |
| C    | -0.0296 | 1.9989 | 4.0065  | 0.0243  | 6.0296  |
| C    | -0.0201 | 1.9989 | 3.9969  | 0.0244  | 6.0201  |
| C    | 0.0013  | 1.9988 | 3.9813  | 0.0186  | 5.9987  |
| C    | 0.0141  | 1.9988 | 3.9718  | 0.0152  | 5.9859  |
| C    | -0.0308 | 1.9989 | 4.0058  | 0.0261  | 6.0308  |
| C    | 0.0303  | 1.9988 | 3.9562  | 0.0147  | 5.9697  |
| C    | 0.0260  | 1.9988 | 3.9608  | 0.0144  | 5.9740  |
| C    | -0.0201 | 1.9987 | 3.9986  | 0.0228  | 6.0201  |
| C    | 0.0025  | 1.9987 | 3.9788  | 0.0200  | 5.9975  |
| C    | -0.0033 | 1.9988 | 3.9814  | 0.0232  | 6.0033  |
| C    | 0.0124  | 1.9987 | 3.9684  | 0.0205  | 5.9876  |
| C    | 0.0214  | 1.9987 | 3.9649  | 0.0149  | 5.9786  |
| C    | -0.0155 | 1.9988 | 3.9918  | 0.0249  | 6.0155  |
| C    | 0.0279  | 1.9987 | 3.9574  | 0.0159  | 5.9721  |
| C    | -0.0096 | 1.9987 | 3.9844  | 0.0265  | 6.0096  |
| C    | -0.0232 | 1.9987 | 4.0000  | 0.0244  | 6.0232  |
| C    | 0.0111  | 1.9987 | 3.9708  | 0.0194  | 5.9889  |
| C    | 0.0028  | 1.9987 | 3.9769  | 0.0216  | 5.9972  |
| C    | 0.0384  | 1.9987 | 3.9461  | 0.0168  | 5.9616  |
| C    | -0.0331 | 1.9987 | 4.0078  | 0.0265  | 6.0331  |
| C    | 0.0332  | 1.9987 | 3.9523  | 0.0159  | 5.9668  |
| C    | -0.0139 | 1.9988 | 3.9901  | 0.0251  | 6.0139  |
| C    | 0.0414  | 1.9987 | 3.9432  | 0.0167  | 5.9586  |
| C    | 0.0276  | 1.9987 | 3.9591  | 0.0146  | 5.9724  |
| C    | 0.0026  | 1.9987 | 3.9765  | 0.0221  | 5.9974  |
| C    | -0.0066 | 1.9987 | 3.9856  | 0.0224  | 6.0066  |
| C    | 0.0001  | 1.9987 | 3.9757  | 0.0256  | 6.0000  |
| S    | -0.3034 | 9.9992 | 6.2382  | 0.0660  | 16.3034 |
| H    | 0.1347  | 0.0000 | 0.8560  | 0.0093  | 0.8653  |
| S    | -0.3002 | 9.9990 | 6.2435  | 0.0576  | 16.3002 |
| H    | 0.0948  | 0.0000 | 0.8991  | 0.0062  | 0.9052  |
| H    | 0.1237  | 0.0000 | 0.8659  | 0.0105  | 0.8764  |
| H    | 0.1350  | 0.0000 | 0.8558  | 0.0092  | 0.8650  |

Table S4: Natural population analysis of (H<sub>2</sub>S)<sub>2</sub>@C<sub>84</sub>

| Atom | charge  | core   | valence | rydberg | total   |
|------|---------|--------|---------|---------|---------|
| C    | 0.0176  | 1.9988 | 3.9701  | 0.0135  | 5.9824  |
| C    | -0.0099 | 1.9989 | 3.9902  | 0.0208  | 6.0099  |
| C    | -0.0016 | 1.9986 | 3.9818  | 0.0212  | 6.0016  |
| C    | -0.0262 | 1.9989 | 4.0041  | 0.0231  | 6.0262  |
| C    | 0.0407  | 1.9986 | 3.9461  | 0.0146  | 5.9594  |
| C    | -0.0389 | 1.9989 | 4.0180  | 0.0220  | 6.0389  |
| C    | -0.0007 | 1.9988 | 3.9799  | 0.0220  | 6.0007  |
| C    | -0.0029 | 1.9988 | 3.9821  | 0.0220  | 6.0029  |
| C    | -0.0110 | 1.9988 | 3.9891  | 0.0231  | 6.0110  |
| C    | 0.0160  | 1.9988 | 3.9641  | 0.0212  | 5.9840  |
| C    | 0.0375  | 1.9988 | 3.9499  | 0.0139  | 5.9625  |
| C    | 0.0118  | 1.9988 | 3.9759  | 0.0135  | 5.9882  |
| C    | -0.0311 | 1.9989 | 4.0090  | 0.0232  | 6.0311  |
| C    | 0.0467  | 1.9986 | 3.9403  | 0.0145  | 5.9533  |
| C    | -0.0018 | 1.9986 | 3.9818  | 0.0214  | 6.0018  |
| C    | -0.0180 | 1.9989 | 3.9979  | 0.0212  | 6.0180  |
| C    | -0.0477 | 1.9989 | 4.0273  | 0.0215  | 6.0477  |
| C    | 0.0463  | 1.9987 | 3.9416  | 0.0134  | 5.9537  |
| C    | -0.0176 | 1.9989 | 3.9991  | 0.0196  | 6.0176  |
| C    | -0.0222 | 1.9990 | 4.0015  | 0.0217  | 6.0222  |
| C    | -0.0114 | 1.9986 | 3.9918  | 0.0209  | 6.0114  |
| C    | -0.0142 | 1.9988 | 3.9940  | 0.0214  | 6.0142  |
| C    | 0.0013  | 1.9988 | 3.9789  | 0.0210  | 5.9987  |
| C    | -0.0132 | 1.9988 | 3.9899  | 0.0245  | 6.0132  |
| C    | 0.0213  | 1.9988 | 3.9648  | 0.0152  | 5.9787  |
| C    | 0.0455  | 1.9986 | 3.9422  | 0.0138  | 5.9545  |
| C    | -0.0040 | 1.9989 | 3.9868  | 0.0183  | 6.0040  |
| C    | -0.0147 | 1.9988 | 3.9979  | 0.0181  | 6.0147  |
| C    | -0.0092 | 1.9986 | 3.9901  | 0.0206  | 6.0092  |
| C    | -0.0032 | 1.9987 | 3.9835  | 0.0210  | 6.0032  |
| C    | -0.0041 | 1.9986 | 3.9826  | 0.0228  | 6.0041  |
| C    | -0.0105 | 1.9989 | 3.9920  | 0.0197  | 6.0105  |
| C    | -0.0196 | 1.9986 | 3.9969  | 0.0241  | 6.0196  |
| C    | 0.0309  | 1.9988 | 3.9551  | 0.0152  | 5.9692  |
| C    | 0.0357  | 1.9988 | 3.9479  | 0.0175  | 5.9643  |
| C    | 0.0524  | 1.9985 | 3.9338  | 0.0152  | 5.9476  |
| C    | -0.0207 | 1.9989 | 3.9979  | 0.0240  | 6.0207  |
| C    | 0.0244  | 1.9988 | 3.9640  | 0.0127  | 5.9756  |
| C    | -0.0299 | 1.9989 | 4.0088  | 0.0222  | 6.0299  |
| C    | -0.0027 | 1.9987 | 3.9835  | 0.0206  | 6.0027  |
| C    | -0.0280 | 1.9989 | 4.0075  | 0.0216  | 6.0280  |
| C    | 0.0364  | 1.9986 | 3.9511  | 0.0138  | 5.9636  |
| C    | -0.0368 | 1.9989 | 4.0157  | 0.0222  | 6.0368  |
| C    | 0.0424  | 1.9986 | 3.9451  | 0.0140  | 5.9576  |
| C    | -0.0167 | 1.9988 | 3.9957  | 0.0221  | 6.0167  |
| C    | -0.0279 | 1.9988 | 4.0063  | 0.0228  | 6.0279  |
| C    | -0.0442 | 1.9989 | 4.0217  | 0.0236  | 6.0442  |
| C    | 0.0295  | 1.9988 | 3.9577  | 0.0140  | 5.9705  |
| C    | -0.0189 | 1.9989 | 3.9979  | 0.0221  | 6.0189  |
| C    | -0.0126 | 1.9989 | 3.9936  | 0.0201  | 6.0126  |
| C    | -0.0099 | 1.9987 | 3.9884  | 0.0229  | 6.0099  |
| C    | -0.0234 | 1.9987 | 4.0014  | 0.0233  | 6.0234  |
| C    | -0.0411 | 1.9989 | 4.0178  | 0.0244  | 6.0411  |
| C    | 0.0422  | 1.9987 | 3.9451  | 0.0140  | 5.9578  |
| C    | 0.0043  | 1.9987 | 3.9758  | 0.0213  | 5.9958  |
| C    | -0.0262 | 1.9989 | 4.0071  | 0.0201  | 6.0262  |
| C    | 0.0457  | 1.9986 | 3.9419  | 0.0139  | 5.9544  |
| C    | -0.0395 | 1.9989 | 4.0175  | 0.0232  | 6.0395  |
| C    | -0.0311 | 1.9989 | 4.0071  | 0.0251  | 6.0311  |
| C    | 0.0282  | 1.9986 | 3.9581  | 0.0151  | 5.9718  |
| C    | 0.0140  | 1.9989 | 3.9737  | 0.0135  | 5.9860  |
| C    | -0.0176 | 1.9989 | 3.9931  | 0.0256  | 6.0176  |
| C    | 0.0502  | 1.9985 | 3.9364  | 0.0148  | 5.9498  |
| C    | 0.0195  | 1.9988 | 3.9597  | 0.0221  | 5.9805  |
| C    | 0.0368  | 1.9988 | 3.9498  | 0.0147  | 5.9632  |
| C    | -0.0354 | 1.9988 | 4.0119  | 0.0247  | 6.0354  |
| C    | 0.0304  | 1.9988 | 3.9563  | 0.0145  | 5.9696  |
| C    | -0.0289 | 1.9989 | 4.0043  | 0.0257  | 6.0289  |
| C    | 0.0332  | 1.9988 | 3.9542  | 0.0138  | 5.9668  |
| C    | -0.0142 | 1.9988 | 3.9913  | 0.0241  | 6.0142  |
| C    | -0.0160 | 1.9988 | 3.9999  | 0.0173  | 6.0160  |
| C    | -0.0303 | 1.9988 | 4.0108  | 0.0207  | 6.0303  |
| C    | -0.0026 | 1.9988 | 3.9846  | 0.0192  | 6.0026  |
| C    | -0.0119 | 1.9988 | 3.9919  | 0.0212  | 6.0119  |
| C    | 0.0322  | 1.9988 | 3.9549  | 0.0142  | 5.9679  |
| C    | -0.0067 | 1.9989 | 3.9848  | 0.0230  | 6.0067  |
| C    | 0.0533  | 1.9985 | 3.9331  | 0.0152  | 5.9468  |
| C    | 0.0515  | 1.9988 | 3.9358  | 0.0140  | 5.9485  |
| C    | -0.0217 | 1.9988 | 3.9971  | 0.0258  | 6.0217  |
| C    | 0.0486  | 1.9985 | 3.9379  | 0.0151  | 5.9515  |
| C    | -0.0097 | 1.9988 | 3.9894  | 0.0215  | 6.0097  |
| C    | -0.0056 | 1.9988 | 3.9844  | 0.0224  | 6.0056  |
| C    | -0.0033 | 1.9988 | 3.9831  | 0.0214  | 6.0033  |
| C    | -0.0162 | 1.9988 | 3.9959  | 0.0214  | 6.0162  |
| S    | -0.3179 | 9.9992 | 6.2587  | 0.0600  | 16.3179 |
| H    | 0.1539  | 0.0000 | 0.8391  | 0.0070  | 0.8461  |
| S    | -0.3187 | 9.9992 | 6.2596  | 0.0600  | 16.3187 |
| H    | 0.1368  | 0.0000 | 0.8566  | 0.0067  | 0.8632  |
| H    | 0.1513  | 0.0000 | 0.8417  | 0.0070  | 0.8487  |
| H    | 0.1322  | 0.0000 | 0.8609  | 0.0069  | 0.8678  |



Table S5: Electron density and Laplacian showing the weak interaction between  $(\text{H}_2\text{S})_2$  and cage in  $(\text{H}_2\text{S})_2@C_{60}$ ,  $(\text{H}_2\text{S})_2@C_{70}$ , and  $(\text{H}_2\text{S})_2@C_{84}$ .

| Species                         | Atoms   | CP     | $\rho_{BCP}$ | $\Delta^2\rho_{BCP}$ |
|---------------------------------|---------|--------|--------------|----------------------|
| $(\text{H}_2\text{S})_2@C_{60}$ | C15-H62 | (3,-1) | 0.04413      | 0.09303              |
|                                 | C26-H66 | (3,-1) | 0.05922      | 0.08059              |
|                                 | C42-H65 | (3,-1) | 0.04803      | 0.08683              |
|                                 | C60-H64 | (3,-1) | 0.04042      | 0.09402              |
| $(\text{H}_2\text{S})_2@C_{70}$ | C17-H76 | (3,-1) | 0.01600      | 0.05136              |
|                                 | C44-H72 | (3,-1) | 0.01646      | 0.05240              |
|                                 | C10-H74 | (3,-1) | 0.04134      | 0.11470              |
|                                 | C22-H75 | (3,-1) | 0.01379      | 0.04492              |
| $(\text{H}_2\text{S})_2@C_{84}$ | C46-H90 | (3,-1) | 0.01059      | 0.03509              |
|                                 | C56-H88 | (3,-1) | 0.00895      | 0.03074              |

Table S6: The stabilization energy in  $\text{kcal mol}^{-1}$  of  $(\text{H}_2\text{S})_2$  encapsulated in  $C_{60}$  fullerene, at different method of DFT functionals.

| Method             | Species                         |
|--------------------|---------------------------------|
|                    | $(\text{H}_2\text{S})_2@C_{60}$ |
| LC-wHPBE/6-31++G** | 186.38                          |
| LC-BLYP/6-31++G**  | 206.07                          |
| LC-wB97X/6-31++G** | 206.44                          |
| wB97XD/6-31++G**   | 186.64                          |
| M06-2X/6-31++G**   | 165.70                          |

Table S7: Comparison of UHF and RHF results of  $(\text{H}_2\text{S})_2@C_{60}$  at LC-wHPBE/6-31++G\*\* level of theory.

| Method              | S-S (Å) | S-H (Å) | H-S-H (deg.) | $\Delta E_{stabilization}$ |
|---------------------|---------|---------|--------------|----------------------------|
| RLC-wHPBE/6-31++G** | 2.00    | 1.36    | 97.02        | 186.38                     |
| ULC-wHPBE/6-31++G** | 1.99    | 1.37    | 97.34        | 185.74                     |

Table S8: Natural electronic configuration, valence electron and natural charge on bare  $(\text{H}_2\text{S})_2$

| Atom                     | electronic configuration                                       | valence electron | natural charge |
|--------------------------|----------------------------------------------------------------|------------------|----------------|
| S                        | [core]3S( 1.72)3p( 4.47)4S( 0.01)3d( 0.05)4p( 0.09)            | 6.34             | -0.33          |
| H                        | 1S( 0.83)2S( 0.01)                                             | 0.84             | 0.16           |
| S                        | [core]3S( 1.71)3p( 4.47)4S( 0.01)3d( 0.05)4p( 0.09)            | 6.33             | -0.33          |
| H                        | 1S( 0.83)2S( 0.01)                                             | 0.84             | 0.16           |
| H                        | 1S( 0.83)                                                      | 0.83             | 0.17           |
| H                        | 1S( 0.83)                                                      | 0.83             | 0.17           |
| $(\text{H}_2\text{S})_2$ | Total valence electrons and charge in $(\text{H}_2\text{S})_2$ | 16.01            | 0.00           |

Table S9: Natural electronic configuration, valence electron and natural charge on  $(\text{H}_2\text{S})_2$  unit obtained from NBO analysis of  $(\text{H}_2\text{S})_2@C_{70}$

| Atom                     | electronic configuration                                       | valence electron | natural charge |
|--------------------------|----------------------------------------------------------------|------------------|----------------|
| S                        | [core]3S( 1.73)3p( 4.51)3d( 0.02)4p( 0.03)5p( 0.02)            | 6.31             | -0.30          |
| H                        | 1S( 0.86)                                                      | 0.86             | 0.13           |
| S                        | [core]3S( 1.71)3p( 4.53)3d( 0.02)4p( 0.02)5p( 0.01)            | 6.29             | -0.30          |
| H                        | 1S( 0.90)                                                      | 0.90             | 0.09           |
| H                        | 1S( 0.87)2S( 0.01)                                             | 0.88             | 0.12           |
| H                        | 1S( 0.86)                                                      | 0.86             | 0.14           |
| $(\text{H}_2\text{S})_2$ | Total valence electrons and charge in $(\text{H}_2\text{S})_2$ | 16.10            | -0.11          |

Table S10: Natural electronic configuration, valence electron and natural charge on  $(\text{H}_2\text{S})_2$  unit obtained from NBO analysis of  $(\text{H}_2\text{S})_2@C_{84}$

| Atom                     | electronic configuration                                       | valence electron | natural charge |
|--------------------------|----------------------------------------------------------------|------------------|----------------|
| S                        | [core]3S( 1.75)3p( 4.51)3d( 0.02)4p( 0.03)5p( 0.01)            | 6.32             | -0.32          |
| H                        | 1S( 0.84)                                                      | 0.84             | 0.15           |
| S                        | [core]3S( 1.75)3p( 4.51)3d( 0.02)4p( 0.03)5p( 0.01)            | 6.32             | -0.32          |
| H                        | 1S( 0.86)                                                      | 0.86             | 0.14           |
| H                        | 1S( 0.84)                                                      | 0.84             | 0.15           |
| H                        | 1S( 0.86)                                                      | 0.86             | 0.13           |
| $(\text{H}_2\text{S})_2$ | Total valence electrons and charge in $(\text{H}_2\text{S})_2$ | 16.04            | -0.06          |

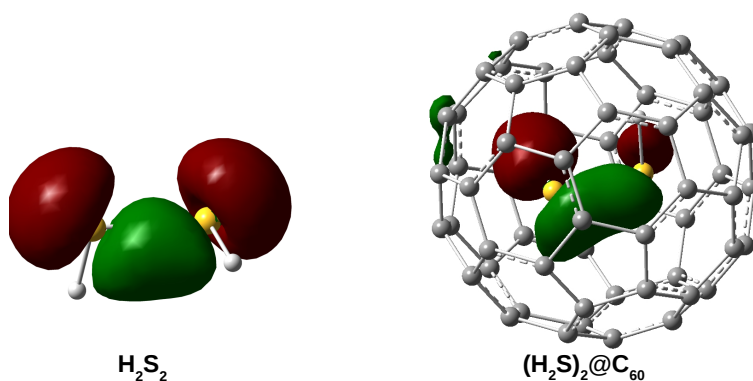

Figure S1: Spatial representation of the S-S bond MO in  $\text{H}_2\text{S}_2$  and  $(\text{H}_2\text{S})_2@C_{60}$  obtained at LC-wHPBE/6-31++G\*\* level of theory

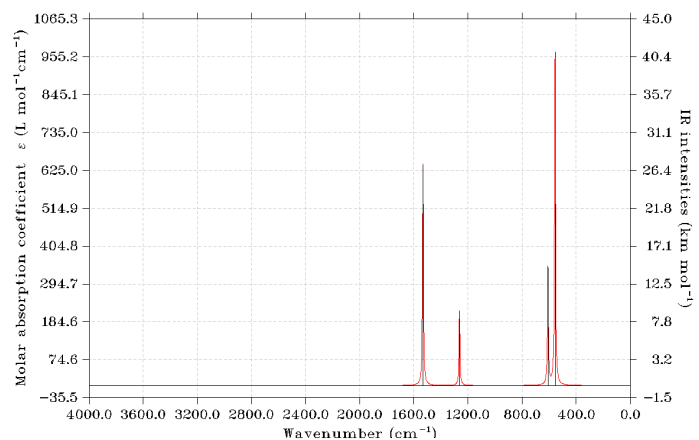

Figure S2: IR plot for the  $C_{60}$  molecule obtained at LC-wHPBE/6-31++G\*\* level of theory.

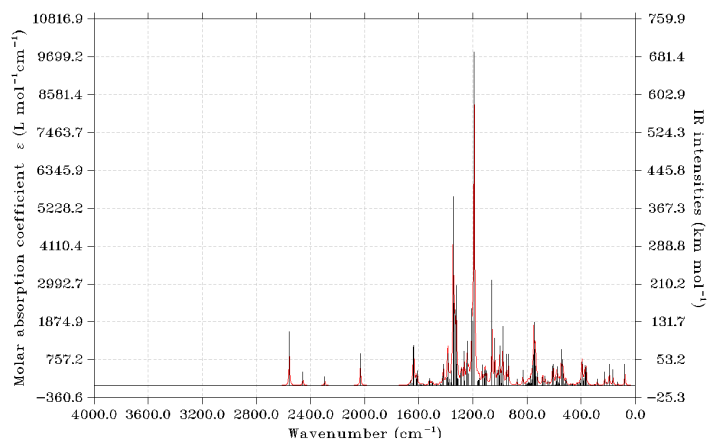

Figure S3: IR plot for the  $(H_2S)_2@C_{60}$  molecule obtained at LC-wHPBE/6-31++G\*\* level of theory

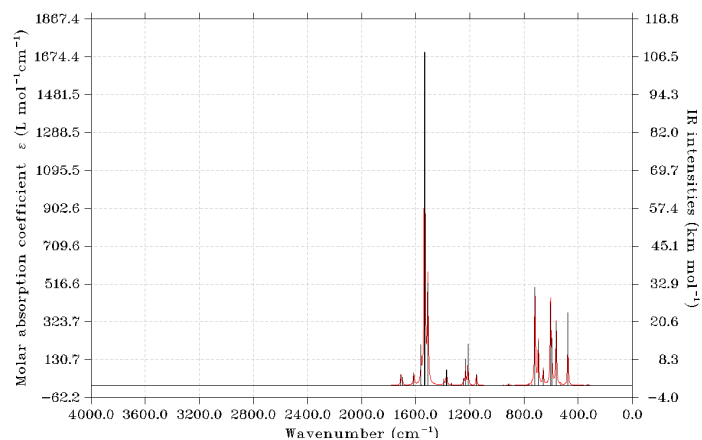

Figure S4: IR plot for the  $C_{70}$  molecule obtained at LC-wHPBE/6-31++G\*\* level of theory.

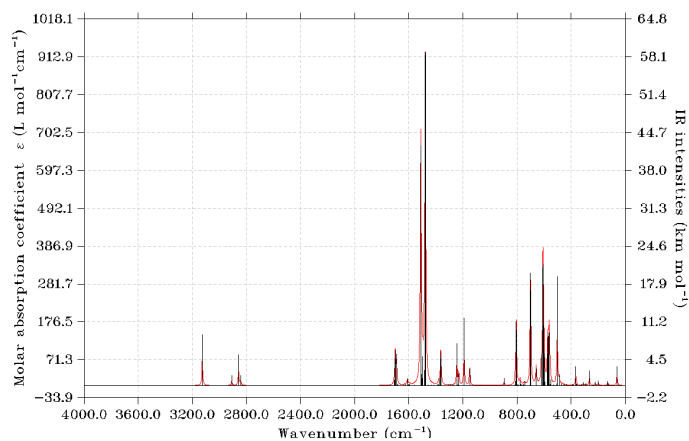

Figure S5: IR plot for the  $(H_2S)_2@C_{70}$  molecule obtained at LC-wHPBE/6-31++G\*\* level of theory

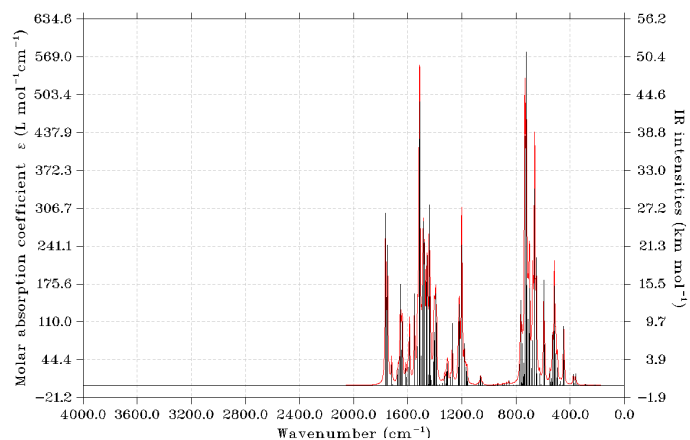

Figure S6: IR plot for the  $C_{84}$  molecule obtained at LC-wHPBE/6-31++G\*\* level of theory.

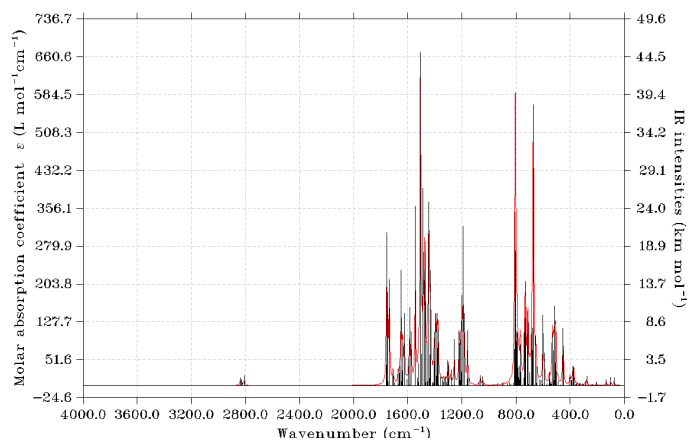

Figure S7: IR plot for the  $(H_2S)_2@C_{84}$  molecule obtained at LC-wHPBE/6-31++G\*\* level of theory
